1  
2  
3  
4  
5  
6  
7  
8  
9  
10  
11  
12  
13  
14  
15  
16  
17  
18  
19  
20  
21  
22  
23  
24  
25  
26  
27

## Capsaicin alters human Nav1.5 mechanosensitivity

Luke M. Cowan<sup>1,2</sup>, Peter R. Strege<sup>1,2</sup>, Radda Rusinova<sup>3</sup>, Olaf S. Andersen<sup>3</sup>,  
Arthur Beyder<sup>1,2\*</sup>, Gianrico Farrugia<sup>1,2\*</sup>

<sup>1</sup>Enteric Neuroscience Program (ENSP), Division of Gastroenterology and Hepatology,

<sup>2</sup>Department of Physiology and Biomedical Engineering, Mayo Clinic, Rochester, MN

<sup>3</sup>Department of Physiology and Biophysics, Weill Cornell Medical College, New York, NY

Running Head: Alteration of Nav1.5 mechanosensitivity by capsaicin

\*Co-Corresponding authors:

Arthur Beyder, M.D. Ph.D. & Gianrico Farrugia

Mayo Clinic

200 First Street SW

Rochester, Minnesota 55905

Phone: 507-284-4695. Fax: 507-284-0266

Email: [beyder.arthur@mayo.edu](mailto:beyder.arthur@mayo.edu) & [farrugia.gianrico@mayo.edu](mailto:farrugia.gianrico@mayo.edu)

28 **AUTHOR CONTRIBUTIONS**

29 Luke M. Cowan: conceived and designed research, performed experiments, analyzed data,  
30 interpreted results of experiments, prepared figures, drafted manuscript, edited and revised  
31 manuscript, approved final version of manuscript

32 Peter R. Strege: conceived and designed research, performed experiments, analyzed data,  
33 interpreted results of experiments, prepared figures, edited and revised manuscript, approved final  
34 version of manuscript

35 Radda Rusinova: conceived and designed research, analyzed data, interpreted results of  
36 experiments, edited and revised manuscript, approved final version of manuscript

37 Olaf S. Andersen: conceived and designed research, analyzed data, interpreted results of  
38 experiments, edited and revised manuscript, approved final version of manuscript

39 Gianrico Farrugia: conceived and designed research, edited and revised manuscript, approved final  
40 version of manuscript

41 Arthur Beyder: conceived and designed research, analyzed data, interpreted results of experiments,  
42 edited and revised manuscript, approved final version of manuscript

43

44 **ABSTRACT**

45 *SCN5A*-encoded Nav1.5 is a voltage-gated Na<sup>+</sup> channel expressed in cardiac myocytes and  
46 human gastrointestinal (GI) smooth muscle cells (SMCs). Nav1.5 contributes to electrical  
47 excitability in the heart and slow waves in the gut. Nav1.5 is also mechanosensitive, and  
48 mechanical force modulates several modes of Nav1.5's voltage-dependent function. Nav1.5  
49 mutations in patients with cardiac arrhythmias and gastrointestinal diseases lead to abnormal  
50 mechano- and voltage-sensitivity. Membrane permeable amphipathic drugs that target Nav1.5 in  
51 the heart and GI tract alter Nav1.5 mechanosensitivity (MS), suggesting that amphipaths may be  
52 a viable therapeutic option for modulating Nav1.5 function. We therefore searched for membrane-  
53 permeable amphipathic agents that would modulate Nav1.5 MS with minimal effect on Nav1.5  
54 voltage-gating intact to more selectively target mechanosensitivity. We used two methods to assess  
55 Nav1.5 MS: (1) membrane suction in cell-attached macroscopic patches and (2) fluid shear stress  
56 on whole cells. We tested the effect of capsaicin on Nav1.5 MS by examining macropatch and  
57 whole-cell Na<sup>+</sup> current parameters with and without force. The pressure- and shear-mediated peak  
58 current increase and acceleration were effectively abolished by capsaicin. Capsaicin abolished the  
59 mechanosensitive shifts in the voltage-dependence of activation (shear) and inactivation (pressure  
60 and shear). Exploring the recovery from inactivation and use-dependent entry into inactivation, we  
61 found divergent stimulus-dependent effects that could potentiate or mitigate the effect of capsaicin,  
62 suggesting that mechanical stimuli may differentially modulate Nav1.5 MS. We conclude that  
63 selective modulation of MS makes capsaicin is a novel modulator of Nav1.5 MS and a promising  
64 therapeutic candidate.

Alteration of Nav1.5 mechanosensitivity by capsaicin  
Cowan et al.

Page 4

65 Keywords: amphipathic, arrhythmia, capsaicin, electrophysiology, functional gastrointestinal  
66 disorder, ion channel, irritable bowel syndrome, mechanosensitivity, mechanotransduction,  
67 voltage-gated sodium channel type 5

68

## 69 INTRODUCTION

70 The *SCN5A*-encoded voltage-gated sodium channel Nav1.5 is mechanosensitive;  
71 mechanical force modulates Nav1.5's voltage-dependent function. This property is particularly  
72 relevant given that Nav1.5 is expressed in mechanically active tissues like the heart and  
73 gastrointestinal tract, where it contributes to electrical excitability in cardiac myocytes (CMs) and  
74 slow waves in smooth muscle cells (SMCs), respectively.<sup>1</sup> At the cellular level, mechanosensitive  
75 channels like Nav1.5 detect mechanical stimuli through lipid bilayer tension and/or cytoskeletal  
76 deformation.<sup>2,3</sup> In patch-clamp studies, mechanical stimuli in the form of membrane stretch and  
77 fluid shear stress modulate Nav1.5's voltage-dependent function by increasing whole-cell  
78 conductance, shifting voltage-dependence to hyperpolarized potentials, and accelerating its  
79 activation and inactivation kinetics. Therefore, in the context of cardiac and intestinal smooth  
80 muscle tissues, Nav1.5 mechanosensitivity (MS) has important implications.<sup>1</sup>

81 Channel-related disorders in common cardiac and gastrointestinal diseases,  
82 channelopathies<sup>4, 5</sup> are strongly linked to *SCN5A* mutations.<sup>6, 7</sup> Many *SCN5A* mutations lead to  
83 voltage-gating abnormalities, some associated with abnormal responses to mechanical stimuli.<sup>7-10</sup>  
84 Impaired stretch modulation in Nav1.5, for example, occurs in some mutations that also cause  
85 LQT3-type cardiac arrhythmias,<sup>8, 11</sup> and some mutations that lead to altered Nav1.5 MS are found  
86 in patients with IBS.<sup>10, 12</sup>

87 Because of their involvement in many diseases, ion channels are prime targets for  
88 pharmacological treatment.<sup>13</sup> Drugs for cardiac diseases may modulate the behavior of sodium  
89 channels like Nav1.5 and influence mechanosensitivity.<sup>13-15</sup> Yet, how membrane-permeable  
90 amphipathic drugs alter the mechanosensitivity of voltage-gated channels like Nav1.5, or whether  
91 they do so by a mechanism separate from Na<sup>+</sup> current inhibition, remain critical unanswered

92 questions.<sup>13-15</sup> For example, the membrane-permeable, amphipathic local anesthetic lidocaine  
93 inhibits peak current while inhibiting Nav1.5 mechanosensitivity at lower concentrations.<sup>13, 14</sup>  
94 Suggesting separate mechanisms for current inhibition and altered mechanosensation by  
95 amphipaths, the anesthetic binding site mutation F1760A<sup>13</sup> eliminates the voltage-dependent  
96 inhibition by lidocaine without altering lidocaine's effect on mechanosensitivity. The membrane-  
97 impermeant lidocaine analog, QX-314, in contrast had no effect on mechanosensitivity.

98           We therefore searched for membrane-permeable amphipathic agents with minimal effects  
99 on Nav1.5 voltage-gating for their impact on Nav1.5 mechanosensitivity. Among the candidates,  
100 capsaicin shows promise, and we characterized its ability to selectively modulate Nav1.5  
101 mechanosensitivity.

102

103 **METHODS**

104 Heterologous expression and cell culture

105 Wild-type *SCN5A* (Q1077del Nav1.5)<sup>16</sup> was co-transfected with pEGFP-C1 into HEK-293  
106 cells with Lipofectamine 3000 reagent (Thermo Fisher Scientific, Massachusetts, USA).

107 Electrophysiology

108 **Pipette fabrication.** For whole-cell experiments, electrodes were pulled on a P-97 puller  
109 (Sutter Instruments, CA) from KG12 glass to a resistance of 2-5 M $\Omega$ . For cell-attached patch  
110 experiments, electrodes were pulled from 8250 glass (King Precision Glass, California, USA) then  
111 fire-polished to wide-bore, bullet-shaped tips with a final resistance of 1-2 M $\Omega$ . Electrodes were  
112 coated with R6101 elastomer (Dow Corning, MI) then cured by a heat gun to reduce capacitive  
113 transients.

114 **Data acquisition.** Whole-cell and cell-attached patch data from HEK-293 cells were  
115 recorded at 20 kHz with an Axopatch 200B patch-clamp amplifier, Digidata 1550, and pClamp11  
116 software (Molecular Devices, CA).

117 **Cell-attached patch. Solutions.** The pipette solution contained (in mM): 150 Na<sup>+</sup>, 160 Cl<sup>-</sup>,  
118 5 K<sup>+</sup>, 2.5 Ca<sup>2+</sup>, 10 HEPES, and 5.5 glucose with an osmolality of 305 mmol/kg and pH of 7.35.  
119 GdCl<sub>3</sub> (10  $\mu$ M) was included in the pipette solution to inhibit endogenous stretch-activated  
120 channels. The bath solution contained (in mM): 15 Na<sup>+</sup>, 140 Cs<sup>+</sup>, 160 Cl<sup>-</sup>, 2.5 Ca<sup>2+</sup>, 5 K<sup>+</sup>, 10  
121 HEPES, and 5.5 glucose with an osmolality of 305 mmol/kg and pH of 7.35. Where applicable,  
122 capsaicin was diluted 1000-fold in bath solution from a 20 mM ethanol stock then added to the  
123 recording chamber. Seal pressures were digitally controlled and monitored by High-Speed  
124 Pressure Clamp (HSPC-2, ALA Scientific, NY). Suction  $\leq$ 10 mmHg was applied to establish giga-  
125 seals. *Episodic protocol and mechanical stimulation by pressure.* Na<sup>+</sup> currents in macroscopic

126 patches were elicited by an identical pair of voltage ladders with 31-ms pressure steps up to -50  
127 mmHg encompassing the second voltage ladder. Patches were held at +100 mV, stepped briefly  
128 for 10 ms to +190 mV to close Nav channels, then stepped through a 10-step voltage ladder from  
129 +100 to 0 mV in 21-ms long, 10-mV increments with a total sweep duration (equivalent to the  
130 interpulse interval) of 280 ms. Recordings were an average of 5 runs. Capsaicin (20  $\mu$ M) was  
131 added to the chamber 5 min before testing the effects of the drug. *Recovery from inactivation:* To  
132 test the effect of pressure on the recovery of Nav1.5 from inactivation, cells were held at 120 mV  
133 and stepped to (1) 20 mV for 30 ms, next to (2) 120 mV for a variable duration to recover, then to  
134 (2) 20 mV for 30 ms. The time between the beginning of each sweep was 5 s. The length of the  
135 recovery time in stage (2) was varied between 1 and 300 ms, with half-log unit increments. The  
136 pressure step per sweep was 400 ms regardless of recovery time. *Use-dependent inactivation:* To  
137 test the effect of pressure on the onset (use dependence) of Nav1.5 inactivation, cells were held at  
138 120 mV and stepped 20 times to 20 mV, and the frequency between steps was 33.33 to 3.33 Hz.  
139 The pressure step per sweep was 30 ms.

140 ***Whole-cell voltage clamp. Solutions.*** The intracellular solution contained (in mM): 145  
141 Cs<sup>+</sup>, 125 CH<sub>3</sub>SO<sub>3</sub><sup>-</sup>, 35 Cl<sup>-</sup>, 5 Na<sup>+</sup>, 5 Mg<sup>2+</sup>, 10 HEPES, and 2 EGTA with an osmolality of 290  
142 mmol/kg and pH of 7.0. The extracellular solution contained (in mM): 15 Na<sup>+</sup>, 140 Cs<sup>+</sup>, 160 Cl<sup>-</sup>,  
143 2.5 Ca<sup>2+</sup>, 5 K<sup>+</sup>, 10 HEPES, and 5.5 glucose with an osmolality of 290 mmol/kg and pH of 7.35.  
144 *Peak current, voltage dependence of activation, and kinetics of activation and inactivation:* To  
145 measure peak Na<sup>+</sup> current density, cells transfected with Nav1.5 were held at -120 mV then pulsed  
146 through a 2-stage, 19-step voltage ladder (1) from -110 to -30 mV in 5 mV intervals for 2.9 s each  
147 and (2) to -30 mV for 100 ms. The time from the start of each sweep to the next was 5 s. Peak  
148 currents at each voltage step were normalized to either the cell capacitance (pF) or the maximum



149 peak inward current without shear. *Recovery from inactivation:* Recovery from inactivation was  
150 measured by holding cells at -130 mV and the pulsed through a 3-stage, 10-step protocol to (1) -30  
151 mV for 100 ms, next to (2) -130 mV for a variable duration to recover, then to (2) -30 mV for 100  
152 ms. The time between sweep starts was 2.5 s. The length of the recovery time in stage (2) of sweep  
153  $n$  was  $4 \cdot 2^n$  ms for a total of  $n = 10$  sweeps. *Use-dependent inactivation:* To measure the onset of  
154 Nav1.5 inactivation, cells were held at -130 mV and stepped 10 times to -40 mV, in which the  
155 frequency of steps recorded ranged between 0.3 and 50 Hz. *Mechanical stimulation by shear*  
156 *stress.* When testing the effect of shear stress, the extracellular (bath) solution was perfused by  
157 gravity drip (at 10 mL/min) for the duration of the voltage protocol.

#### 158 Data Analysis

159 The maximum peak Na<sup>+</sup> current and voltage dependence of activation were determined by  
160 fitting the Nav1.5 current-voltage (I-V) plots with  $I_V = G_{MAX} \cdot (V - E_{REV}) / (1 + e^{(V - V_{1/2A}) / slope})$ , where  
161  $G_{MAX}$  is the maximum Na<sup>+</sup> conductance in whole cells ( $I_{MAX}$  is the maximum Na<sup>+</sup> current in  
162 patches), and  $V_{1/2A}$  is the voltage of half-activation. Activation kinetics were determined by fitting  
163 currents with a two-term weighted exponential function:  $I(t) = A_1 e^{(-t/\tau_A)} + A_2 e^{(-t/\tau_I)}$ , where  $\tau_A$  and  $\tau_I$   
164 are the time constants of activation and inactivation, respectively, and  $A_X$  and  $C$  were constants.  
165 Steady-state inactivation was obtained by fitting available peak Na<sup>+</sup> currents with a 3-parameter  
166 sigmoid curve:  $I_V = I / (1 + e^{((V - V_{1/2I}) / \delta V_I)})$ , where  $V_{1/2I}$  is the half-point of steady-state inactivation  
167 (availability), and  $\delta V_I$  the slope. To determine the recovery from inactivation, peak Na<sup>+</sup> currents  
168 were fit with the equation:  $I/I_0 = I / (1 + t/t_{1/2})^b$ , where  $I/I_0$  is the ratio of Na<sup>+</sup> current recovered  
169 following inactivation from the control current,  $b$  the rate of inactivation recovery, and  $t_{1/2}$  the time  
170 where half of the Na<sup>+</sup> current has recovered from inactivation. Use-dependent inactivation was  
171 estimated by fitting the peak Na<sup>+</sup> currents of successive pulses with the equation:  $I_{10}/I_1 = I_f e^{b/(x+c)}$ ,

172 where  $I_{10}/I_1$  is the peak  $\text{Na}^+$  current in step 10 normalized to the peak of step 1, and  $I_f$  the maximally  
173 inactivated peak  $\text{Na}^+$  current at frequency  $f$ , and  $b$  or  $c$  is the rate or constant of use-dependent  
174 inhibition, respectively. To calculate the half-frequency of use-dependent inactivation,  $I_f$  was  
175 plotted vs. pulse frequency  $f$  and fit with  $I_f = (1-a)/(1+e^{(f/2-f)/b})$ , where  $a$  is limit of use-dependent  
176 inhibition,  $f_{1/2}$  the half frequency of use-dependent inhibition, and  $b$  the slope. Data are expressed  
177 as the mean  $\pm$  standard error of the mean (SEM). Significance was tested using a 2-way ANOVA  
178 with Tukey post-test, in which  $P < 0.05$  when comparing force to rest or capsaicin to drug-free.

179

180 **RESULTS**

181 Screen of amphipathic membrane-permeable drugs

182 We examined select amphipathic agents with high partition coefficients (Table 1) as  
183 potential modulators of Nav1.5 voltage dependence.<sup>17-20</sup> We tested each compound ( $10^{-9}$  to  $10^{-4}$   
184 M) for its ability to inhibit peak voltage-gated Na<sup>+</sup> currents (Figure 1A-D). Of the agents tested,  
185 Triton X-100 ( $\log P_{ow}$  4.6,  $IC_{50}$  5.3  $\mu$ M, Figure 1C-D), was the most potent and capsaicin ( $\log P_{ow}$   
186 3.04,  $IC_{50}$  60.2  $\mu$ M, Figure 1C-D, Table 1) the least. The antiarrhythmic amiodarone ( $\log P_{ow}$  7.2,  
187  $IC_{50}$  8.4  $\mu$ M, Figure 1C-D) and  $\beta$ -blocker propranolol ( $\log P_{ow}$  3.48,  $IC_{50}$  7.6  $\mu$ M, Figure 1C-D)  
188 also inhibited Nav1.5 voltage-gating. Propranolol, which had a partition coefficient ( $\log P_{ow}$ )  
189 similar to capsaicin, was an 8-fold more potent Nav1.5 inhibitor than the latter, indicating that  
190  $\log P_{ow}$  is not a good predictor of the drug's effect on Nav1.5 voltage-gated function. Because our  
191 goal was to test mechanosensitivity while minimizing Nav1.5 voltage-dependent gating inhibition,  
192 we chose capsaicin (20  $\mu$ M) for further investigation, as this dose inhibited voltage-dependent Na<sup>+</sup>  
193 current by  $\leq 25\%$  without mechano stimulus (Figure 1B-D).

194 Capsaicin inhibits increases in peak current and acceleration with mechanical stimuli

195 To test the effect of capsaicin on Nav1.5 mechanosensitivity, we used two complementary  
196 approaches for mechanical stimulation: (1) cell-attached macroscopic patches with suction and (2)  
197 whole-cell configuration with fluid shear stress (Tables 2-3, Figure 2). These complementary  
198 techniques allow us to highlight different aspects of the channels' mechanosensitivity due to both  
199 techniques' intrinsic strengths and weaknesses.<sup>11, 21-23</sup> The effect of pressure was tested in a pair-  
200 wise fashion<sup>1, 11, 14</sup>, with pressure at 0 or -30 mmHg applied at each voltage step (Figure 2A,C,E-  
201 H). Whole-cell current responses to shear was tested by perfusion at 0 or 10 mL/min (Figure  
202 2B,D,E-H). We then reassessed function in both configurations in the presence of 20  $\mu$ M capsaicin

203 (Tables 2-3, Figure 2A-H). Suction increased normalized peak currents ( $I_{MAX}$ ) by  $16.6\pm 2.4\%$   
204 ( $P<0.05$ ;  $n = 24$ ; Figure 2A,C,E), and shear increased the peak current ( $I_{PEAK}$ ) by  $16.0\pm 3.1\%$  in  
205 whole cells ( $0.26\pm 0.10$  nS increase in conductance;  $P<0.05$ , 0 to 10 mL/min;  $n = 12$ ; Figure  
206 2B,C,E). Capsaicin decreased  $I_{PEAK}$  by  $22.1\pm 3.9\%$  ( $P<0.05$ , 0 to 20  $\mu$ M capsaicin), and both  
207 pressure ( $+4.8\pm 3.0\%$ ) and shear sensitivity ( $+3.1\pm 3.8\%$ ,  $+0.08\pm 0.05$  nS) were lost ( $n = 12-14$ ,  
208  $P>0.05$  to drug with no force).

209 In the absence of drug, pressure and shear accelerated  $Na^+$  current activation, decreasing  
210 the activation constant ( $\tau_{ACT}$ ) by  $20.0\pm 5.3\%$  or  $20.4\pm 3.3\%$ , respectively ( $n = 12-14$ ,  $P<0.05$  to no  
211 force controls; Figure 2F). Capsaicin accelerated Nav1.5 activation by  $20.3\pm 6.9\%$  at rest ( $n = 12-$   
212  $14$ ,  $P<0.05$ , 0 to 20  $\mu$ M capsaicin) in whole cells but not in patches, and capsaicin inhibited the  
213 acceleration of activation induced by pressure and shear, as  $\tau_{ACT}$  did not accelerate with pressure  
214 or shear ( $-11.0\pm 5.4\%$  or  $-1.3\pm 7.0\%$ , respectively;  $n = 12-14$ ,  $P>0.05$  to drug with no force, Figure  
215 2F). Our results thus show that capsaicin inhibits the mechanosensitivity of peak current and  
216 kinetics of Nav1.5 in both experimental configurations.

### 217 Capsaicin inhibits mechanically induced hyperpolarizing shifts in the voltage dependence of 218 activation and availability

219 Pressure<sup>1, 13, 14, 24</sup> and shear<sup>3, 11, 12</sup> produce hyperpolarizing shifts in the voltage dependence  
220 of Nav1.5 activation and inactivation. Membrane-permeable amphipathic drugs like lidocaine and  
221 ranolazine reduce these mechanosensitive shifts in voltage dependence.<sup>13, 14</sup> Therefore, we  
222 explored whether capsaicin could reduce the pressure- or shear-induced shifts in voltage  
223 dependence. Like in our previous work without drug<sup>13, 14</sup>, suction ( $-30$  mmHg) produced a leftward  
224 shift of  $-4.5\pm 0.6$  mV, and shear stress induced a smaller but significant shift of  $-1.5\pm 0.6$  mV in the  
225 voltage dependence of activation ( $V_{1/2A}$ ) ( $P<0.05$  to no force) (Table 2, Table 3, Figure 2C, G).

226 Without force, capsaicin produced a hyperpolarized shift in  $V_{1/2A}$  ( $-1.6 \pm 0.4$  mV;  $P < 0.05$ , 0 to 20  
227  $\mu$ M capsaicin) in whole cells. With force, capsaicin inhibited the shear-induced shift in  $V_{1/2A}$   
228 ( $-0.3 \pm 0.1$  mV,  $P > 0.05$  to drug with no shear) but not the pressure-induced shift ( $-2.4 \pm 0.6$  mV,  
229  $P < 0.05$  to drug with no pressure). Similar to shear-induced shifts in  $V_{1/2A}$ , pressure or shear shifted  
230 the voltage dependence of inactivation or availability ( $V_{1/2I}$ ) in the absence of capsaicin ( $-6.0 \pm 0.9$   
231 mV with pressure or  $-2.5 \pm 0.9$  mV with shear,  $P < 0.05$  to no force) (Tables 2-3, Figure 2D,H).  
232 Without force, capsaicin produced a hyperpolarizing shift in whole-cell  $V_{1/2I}$  by  $-5.1 \pm 0.7$  mV, as  
233 previously observed<sup>25</sup>. In the presence of capsaicin, however, neither pressure nor shear had a  
234 significant effect on  $V_{1/2I}$  ( $-1.4 \pm 1.2$  or  $-0.5 \pm 0.6$  mV change, respectively,  $P > 0.05$  to drug with no  
235 force), suggesting loss of the MS of Nav1.5 inactivation. Overall, our results show that capsaicin  
236 inhibited the mechanosensitive shifts in Nav1.5 gating.

### 237 Effects of capsaicin and mechanical stimuli on recovery from inactivation

238 Both capsaicin and pressure delay recovery of Nav1.5 from fast inactivation.<sup>1, 25</sup> Therefore,  
239 we tested whether the presence of capsaicin affected the recovery from fast inactivation (1 to 1000  
240 ms) in the absence or presence of mechanical stimuli (Tables 2-3, Figure 3A-B). Without force or  
241 drug, Na<sup>+</sup> currents recovered within  $\sim 100$  ms in either configuration (Figure 3C); the half-time of  
242 Nav1.5 inactivation recovery ( $t_{1/2R}$ ) at rest was  $13.2 \pm 2.5$  ms in the patch and  $18.8 \pm 1.7$  ms in whole-  
243 cell (Tables 2-3, Figure 3C-F). In addition, unlike the consistent responses to force regardless of  
244 stimulus or configuration described above, here we observed consistent differences between the  
245 two approaches. Shear accelerated Nav1.5  $t_{1/2R}$  by  $2.2 \pm 0.6$  ms ( $P < 0.05$ , 0 to 10 mL/min), whereas  
246 pressure delayed the  $t_{1/2R}$  ( $+8.9 \pm 3.9$  ms,  $P < 0.05$ , 0 to -30 mmHg) (Tables 2-3, Figure 3C-F). In  
247 whole cells, without force, capsaicin delayed the recovery from inactivation;  $t_{1/2R}$  increased from  
248  $18.8 \pm 1.7$  to  $38.0 \pm 4.5$  ms ( $P < 0.05$ , 0 to 20  $\mu$ M capsaicin). With capsaicin present, pressure

249 increased  $t_{1/2R}$  by  $19.2 \pm 8.2$  ms ( $P < 0.05$  to drug with no pressure), whereas shear reduced  $t_{1/2R}$  in  
250 whole cells by  $9.5 \pm 0.9$  ms ( $P < 0.05$  to drug with no shear). These data show that shear stress on  
251 whole cells and pressure on patches had opposite effects (shear accelerating, suction slowing). In  
252 both approaches, the recovery from inactivation was delayed by capsaicin, and capsaicin further  
253 delayed recovery in patches but accelerated recovery in whole cells.

#### 254 Effects of capsaicin and mechanical stimuli on use-dependent inactivation

255 Capsaicin can stabilize the inactivated state of Nav1.5 through use-dependent inhibition.<sup>25</sup>  
256 The effects of pressure on use-dependent Nav1.5 function have not been fully explored, and we  
257 tested whether force can alter use-dependent inactivation of Nav1.5 in the absence or presence of  
258 capsaicin (Figure 4A-F). To measure the use-dependent inhibition of Nav1.5 expressed in HEK  
259 cells, Na<sup>+</sup> currents elicited by steps to 0 or -30 mV in patches or whole cells were sampled at 3-33  
260 Hz or 0.3-50 Hz, respectively. Without force or drug, the maximum use-dependent inhibition of  
261 Nav1.5 was  $80.9 \pm 7.9\%$  with a half-frequency ( $f_{1/2}$ ) of  $22.3 \pm 2.6$  Hz in patches (Table 2, Figure  
262 4C,E-F), and  $64.6 \pm 2.4\%$  with a  $f_{1/2}$  of  $26.1 \pm 2.0$  Hz in whole-cells (Table 3, Figure 4D-F). The use  
263 dependence did not change with either pressure or shear in the absence of capsaicin ( $P > 0.05$  to no  
264 force, Tables 2-3, Figure 4C-F). In the absence of shear, capsaicin increased the maximum use-  
265 dependent inhibition of Nav1.5 to  $89.0 \pm 1.4\%$  and decreased  $f_{1/2}$  to  $18.9 \pm 1.0$  Hz ( $P < 0.05$ , 0 to 20  
266  $\mu$ M capsaicin). In the presence of capsaicin, shear produced a modest decrease in the maximum  
267 use-dependent inhibition ( $5.1 \pm 0.9\%$ ;  $P < 0.05$  to drug with no shear), and  $f_{1/2}$  was unaffected,  
268 suggesting that shear partially reverses the use-dependent inhibition of Nav1.5 promoted by  
269 capsaicin. In patches, capsaicin affected neither the use-dependent inhibition nor  $f_{1/2}$  at rest  
270 ( $P > 0.05$ , 0 to 20  $\mu$ M capsaicin) but increased the pressure-sensitivity ( $f_{1/2}$  decreased by  $2.4 \pm 3.3$   
271 Hz;  $P < 0.05$  to drug with no pressure), suggesting that pressure is synergistic with capsaicin to

272 decrease the frequency at which Nav<sub>v</sub>1.5 undergoes use dependent inhibition. Together, our results  
273 suggest that though capsaicin enhances use-dependent inhibition, its effect on force-dependent  
274 changes to Nav<sub>v</sub>1.5 use dependence may be specific to the type of force applied.

275

276 **DISCUSSION**

277 Our study aimed to test the impact of a membrane-permeable amphipathic agent on Nav1.5  
278 mechanosensitivity. We selected compounds with high partition coefficients and tested the  
279 inhibition of Nav1.5 voltage-gating. Capsaicin inhibited Nav1.5 mechanosensitivity comparable  
280 to the amphipaths lidocaine<sup>13, 14</sup> and ranolazine<sup>14</sup>. Capsaicin consistently inhibited the effects of  
281 pressure or shear stress on Nav1.5 in membrane patches or whole cells, respectively, by (1)  
282 diminishing the mechanosensitive increases in Na<sup>+</sup> current, (2) shifts in steady-state voltage  
283 dependence, and (3) acceleration of Nav1.5 gating kinetics.

284 Quantifying mechanosensitive changes in ion channel function can be challenging, and few  
285 studies have explored Nav1.5 mechanosensitivity using whole-cell and patch modes in parallel.<sup>11, 13</sup>  
286 To our knowledge, this is the first study to compare the effects of pressure and shear on the  
287 mechanosensitive operation of Nav1.5 in the absence nor presence of drug. Most of Nav1.5's  
288 mechanosensitive responses and capsaicin's effects on Nav1.5 MS were similar in the two testing  
289 modes. Both produced an increase in peak Na<sup>+</sup> current, a shift in V<sub>1/2A</sub>, a shift in V<sub>1/2I</sub>, and an  
290 acceleration in τ<sub>A</sub>. Capsaicin, using either approach, inhibited MS effects on the above biophysical  
291 parameters. This is important because mechanical strain leads to faster and greater Na<sup>+</sup> influx,  
292 which increases Nav channel availability and further depolarizes the membrane (closer to the  
293 threshold to fire action potentials or elicit autonomous membrane depolarizations). Capsaicin  
294 would reduce Na<sup>+</sup> influx, slow membrane depolarization (or hyperpolarize the membrane) thereby  
295 reducing the effect of mechanical forces on Nav channel availability.

296 Surprisingly, we found opposite responses in the pressure- and shear-sensitivity of  
297 Nav1.5 inactivation recovery and use-dependent inactivation. Pressure increased the inactivation  
298 recovery time, whereas shear stress decreased it. Addition of capsaicin to patches resulted in a



299 further delay of Nav1.5 inactivation recovery in patches under pressure, in contrast to whole  
300 cells, where shear stress accelerated inactivation recovery whether or not capsaicin was present.  
301 Similarly, capsaicin and pressure, when applied together, decreased the frequency of use-  
302 dependent inactivation in patches, while in whole cells capsaicin alone lowered use-dependence  
303 frequency, a process unaffected by shear stress. Pressure has previously been shown to prolong  
304 Nav1.5 inactivation recovery time in patches<sup>1</sup>, but the effect of shear stress on inactivation  
305 recovery or use-dependent inhibition of Nav1.5 was previously unknown. The opposite  
306 responses in use dependence and recovery using the two approaches are independent of  
307 capsaicin, and therefore suggest that these mechanical stimuli may act through different  
308 mechanisms.<sup>21, 26</sup> Conceivably, the effect of pressure or shear stress on the membrane or  
309 cytoskeleton could be different. The similar increases in peak current, as a result of pressure or  
310 shear, reflect a greater probability of Nav channels in the open state, whereas the divergent  
311 effects of pressure and shear on use-dependence and inactivation recovery represent different  
312 pathways by which Nav channels are entering or leaving the inactivated state. Shear can lead to  
313 uniaxial elastic tension along the membrane, yielding asymmetrical sliding of lipid membrane  
314 leaflets<sup>29,30</sup>, and the effects of lipid bilayer thinning affect some functional modes, such as  
315 inactivation, more than others<sup>27, 28</sup>. Meanwhile, macroscopic patch suction can create unequal  
316 transmembrane surface tension<sup>2, 21, 29</sup>, with the tension being greatest at the top of the dome.  
317 Therefore, while both stimuli may be used to study mechanosensitivity of Nav1.5 and other  
318 mechanosensitive ion channels, functional consequences may be dependent on channel's  
319 functional modes under study.

320 Capsaicin can inhibit Nav1.5 at rest by promoting Nav channel inactivation but shows  
321 greater potency for inhibiting the inactivation-removed (IR) Nav channel triple mutant, WCW, on

322 the pore lumen DIS6 segment, in the analogous position and across from F1760 in the local  
323 anesthetic binding site on the DIVS6 segment.<sup>25, 30</sup> Interestingly, the IR sequence in Nav1.5  
324 (L407W-L409C-A410W) would be 9 amino acids downstream from and functionally similar to  
325 IR mutant T220A in bacterial homolog NaChBac, which has greater shear-sensitivity than its wild-  
326 type. Whether inhibition of mechanosensitivity by capsaicin requires the LXLA sequence in  
327 Nav1.5 remains to be seen, yet finding a shared interaction motif suggests that the LA binding  
328 region might sensitize Nav1.5 and other mechanosensitive voltage-gated channels<sup>31</sup> or mechano-  
329 gated channels<sup>32</sup> to amphipathic MS inhibition. Capsaicin had divergent effects on pressure- and  
330 shear-sensitivity of Nav1.5 use-dependent inhibition or inactivation recovery, suggesting that  
331 specific types of force may differentially modulate Nav1.5 mechanosensitivity.

332 Another amphiphilic Nav1.5 modulator, ranolazine, inhibits the increase in peak Na<sup>+</sup>  
333 current and the hyperpolarization of voltage dependence of activation induced by pressure or shear  
334 stress comparable to capsaicin<sup>14</sup>. Ranolazine is an anti-ischemic agent that may cause constipation  
335 as a common side effect<sup>33</sup>; muscle contractility in human colon smooth muscle cells was lost when  
336 ranolazine inhibited Nav1.5 peak current and mechanosensitivity.<sup>34</sup> The effects of capsaicin,  
337 lidocaine<sup>13</sup>, and ranolazine<sup>14</sup> as mechanosensitivity inhibitors demonstrate that membrane-  
338 permeable amphipathic agents may be candidates for modulating Nav1.5 mechanosensitivity and  
339 targeting dysfunction in mechanosensitive channelopathies. Amphipathic drugs are widely used in  
340 the clinical practice to target ion channels, but are rarely used for mechano-modulation.<sup>12,13</sup>  
341 Channelopathies involving mechanosensitive dysfunction are an emerging area of study.<sup>6, 7, 9-11, 35</sup>  
342 Ion channelopathies in voltage-sensitive mechano-gated Piezo channels<sup>36-38</sup> and channelopathies  
343 affecting Nav1.5 mechanosensitivity have been identified, but both lack treatment options. Hence,  
344 drugs that can target and modulate mechanosensitivity carry promise for treating disease.

345 Capsaicin inhibits its canonical target TRPV1 in sensory neurons to improve GI  
346 dysfunction in IBS-D patients<sup>39</sup>; however, TRPV1 is not pressure-sensitive up to -90 mmHg<sup>40</sup> and  
347 does not have high expression in HEK cells<sup>29, 41</sup>. Capsaicin has shown promise in targeting pain in  
348 IBS. Interestingly, it also has effects on gut motility<sup>42-44</sup>, possibly through its function on Nav1.5  
349 mechanosensitivity. Therefore, there may be an exciting possibility of using capsaicin to affect  
350 sensory (TRPV1) and motility (SCN5A/Nav1.5) processes by different mechanisms in the GI tract.  
351

352 **ACKNOWLEDGEMENTS**

353           We thank Kristy Zodrow for administrative assistance. This work was supported by NIH  
354 grants DK052766 (GF), DK106456 (AB), and the National Center for Complementary and  
355 Integrative Health AT10875 (AB).

356 **REFERENCES**

- 357 [1] Beyder, A., Rae, J. L., Bernard, C., Strege, P. R., Sachs, F., and Farrugia, G. (2010)  
358 Mechanosensitivity of Nav1.5, a voltage-sensitive sodium channel, *J Physiol* 588, 4969-  
359 4985.
- 360 [2] Sukharev, S., and Sachs, F. (2012) Molecular force transduction by ion channels: diversity  
361 and unifying principles, *J Cell Sci* 125, 3075-3083.
- 362 [3] Strege, P. R., Holm, A. N., Rich, A., Miller, S. M., Ou, Y., Sarr, M. G., and Farrugia, G.  
363 (2003) Cytoskeletal modulation of sodium current in human jejunal circular smooth  
364 muscle cells, *Am J Physiol Cell Physiol* 284, C60-66.
- 365 [4] Beyder, A., and Farrugia, G. (2016) Ion channelopathies in functional GI disorders, *Am. J.*  
366 *Physiol. Gastrointest. Liver Physiol.* 311, G581-G586.
- 367 [5] Kass, R. S. (2005) The channelopathies: novel insights into molecular and genetic  
368 mechanisms of human disease, *The Journal of clinical investigation* 115, 1986-1989.
- 369 [6] Marban, E. (2002) Cardiac channelopathies, *Nature* 415, 213-218.
- 370 [7] Beyder, A., and Farrugia, G. (2016) Ion channelopathies in functional GI disorders, *Am J*  
371 *Physiol Gastrointest Liver Physiol* 311, G581-G586.
- 372 [8] Banderali, U., Juranka, P. F., Clark, R. B., Giles, W. R., and Morris, C. E. (2010) Impaired  
373 stretch modulation in potentially lethal cardiac sodium channel mutants, *Channels*  
374 (*Austin*) 4, 12-21.
- 375 [9] Beyder, A., Mazzone, A., Strege, P. R., Tester, D. J., Saito, Y. A., Bernard, C. E., Enders, F.  
376 T., Ek, W. E., Schmidt, P. T., Dlugosz, A., Lindberg, G., Karling, P., Ohlsson, B.,  
377 Gazouli, M., Nardone, G., Cuomo, R., Usai-Satta, P., Galeazzi, F., Neri, M., Portincasa,  
378 P., Bellini, M., Barbara, G., Camilleri, M., Locke, G. R., Talley, N. J., D'Amato, M.,  
379 Ackerman, M. J., and Farrugia, G. (2014) Loss-of-function of the voltage-gated sodium  
380 channel Nav1.5 (channelopathies) in patients with irritable bowel syndrome,  
381 *Gastroenterology* 146, 1659-1668.
- 382 [10] Saito, Y. A., Strege, P. R., Tester, D. J., Locke, G. R., 3rd, Talley, N. J., Bernard, C. E., Rae,  
383 J. L., Makielski, J. C., Ackerman, M. J., and Farrugia, G. (2009) Sodium channel  
384 mutation in irritable bowel syndrome: evidence for an ion channelopathy, *Am. J. Physiol.*  
385 *Gastrointest. Liver Physiol.* 296, G211-218.
- 386 [11] Strege, P. R., Mercado-Perez, A., Mazzone, A., Saito, Y. A., Bernard, C. E., Farrugia, G.,  
387 and Beyder, A. (2019) SCN5A mutation G615E results in Nav1.5 voltage-gated sodium  
388 channels with normal voltage-dependent function yet loss of mechanosensitivity,  
389 *Channels (Austin)* 13, 287-298.
- 390 [12] Strege, P. R., Mazzone, A., Bernard, C. E., Neshatian, L., Gibbons, S. J., Saito, Y. A.,  
391 Tester, D. J., Calvert, M. L., Mayer, E. A., Chang, L., Ackerman, M. J., Beyder, A., and

- 392 Farrugia, G. (2017) Irritable bowel syndrome (IBS) patients have SCN5A  
393 channelopathies that lead to decreased Nav1.5 current and mechanosensitivity, *Am J*  
394 *Physiol Gastrointest Liver Physiol* 314, G494-G503.
- 395 [13] Beyder, A., Strege, P. R., Bernard, C., and Farrugia, G. (2012) Membrane permeable local  
396 anesthetics modulate Nav1.5 mechanosensitivity, *Channels (Austin)* 6, 308-316.
- 397 [14] Beyder, A., Strege, P. R., Reyes, S., Bernard, C. E., Terzic, A., Makielski, J., Ackerman, M.  
398 J., and Farrugia, G. (2012) Ranolazine decreases mechanosensitivity of the voltage-gated  
399 sodium ion channel Nav1.5: a novel mechanism of drug action, *Circulation* 125, 2698-  
400 2706.
- 401 [15] Kraichely, R. E., Strege, P. R., Sarr, M. G., Kendrick, M. L., and Farrugia, G. (2009)  
402 Lysophosphatidyl choline modulates mechanosensitive L-type Ca<sup>2+</sup> current in circular  
403 smooth muscle cells from human jejunum, *Am J Physiol Gastrointest Liver Physiol* 296,  
404 G833-839.
- 405 [16] Makielski, J. C., Ye, B., Valdivia, C. R., Pagel, M. D., Pu, J., Tester, D. J., and Ackerman,  
406 M. J. (2003) A ubiquitous splice variant and a common polymorphism affect  
407 heterologous expression of recombinant human SCN5A heart sodium channels, *Circ.*  
408 *Res.* 93, 821-828.
- 409 [17] Ho, Y. F., Chou, H. Y., Chu, J. S., and Lee, P. I. (2018) Comedication with interacting  
410 drugs predisposes amiodarone users in cardiac and surgical intensive care units to acute  
411 liver injury: A retrospective analysis, *Medicine (Baltimore)* 97, e12301.
- 412 [18] LaHann, T. R., DeKrey, L. J., and Tarr, B. D. (1989) Capsaicin analgesia: predictions based  
413 on physico-chemical properties, *Proc West Pharmacol Soc* 32, 201-204.
- 414 [19] Avdeef, A., Box, K. J., Comer, J. E., Hibbert, C., and Tam, K. Y. (1998) pH-metric logP 10.  
415 Determination of liposomal membrane-water partition coefficients of ionizable drugs,  
416 *Pharm Res* 15, 209-215.
- 417 [20] PubChem. (2019) PubChem Compound Summary for CID 5590, Octoxinol, NIH, National  
418 Library of Medicine.
- 419 [21] Suchyna, T. M., Markin, V. S., and Sachs, F. (2009) Biophysics and structure of the patch  
420 and the gigaseal, *Biophys J* 97, 738-747.
- 421 [22] Morris, C. E. (2011) Voltage-gated channel mechanosensitivity: fact or friction?, *Front*  
422 *Physiol* 2, 25.
- 423 [23] Sokabe, M., and Sachs, F. (1990) The structure and dynamics of patch-clamped membranes:  
424 a study using differential interference contrast light microscopy, *J Cell Biol* 111, 599-  
425 606.
- 426 [24] Morris, C. E., and Juranka, P. F. (2007) Nav channel mechanosensitivity: activation and  
427 inactivation accelerate reversibly with stretch, *Biophys. J.* 93, 822-833.

- 428 [25] Lundbaek, J. A., Birn, P., Tape, S. E., Toombes, G. E., Sogaard, R., Koeppe, R. E., 2nd,  
429 Gruner, S. M., Hansen, A. J., and Andersen, O. S. (2005) Capsaicin regulates voltage-  
430 dependent sodium channels by altering lipid bilayer elasticity, *Mol Pharmacol* 68, 680-  
431 689.
- 432 [26] Dimitrakopoulos, P. (2012) Analysis of the variation in the determination of the shear  
433 modulus of the erythrocyte membrane: Effects of the constitutive law and membrane  
434 modeling, *Phys Rev E Stat Nonlin Soft Matter Phys* 85, 041917.
- 435 [27] Lundbaek, J. A., Koeppe, R. E., 2nd, and Andersen, O. S. (2010) Amphiphile regulation of  
436 ion channel function by changes in the bilayer spring constant, *Proc. Natl. Acad. Sci. U.*  
437 *S. A.* 107, 15427-15430.
- 438 [28] Lundbaek, J. A., Collingwood, S. A., Ingolfsson, H. I., Kapoor, R., and Andersen, O. S.  
439 (2010) Lipid bilayer regulation of membrane protein function: gramicidin channels as  
440 molecular force probes, *J R Soc Interface* 7, 373-395.
- 441 [29] Bavi, N., Nakayama, Y., Bavi, O., Cox, C. D., Qin, Q. H., and Martinac, B. (2014)  
442 Biophysical implications of lipid bilayer rheometry for mechanosensitive channels, *Proc*  
443 *Natl Acad Sci U S A* 111, 13864-13869.
- 444 [30] Wang, S. Y., Mitchell, J., and Wang, G. K. (2007) Preferential block of inactivation-  
445 deficient Na<sup>+</sup> currents by capsaicin reveals a non-TRPV1 receptor within the Na<sup>+</sup>  
446 channel, *Pain* 127, 73-83.
- 447 [31] Lyford, G. L., Strege, P. R., Shepard, A., Ou, Y., Ermilov, L., Miller, S. M., Gibbons, S. J.,  
448 Rae, J. L., Szurszewski, J. H., and Farrugia, G. (2002) alpha(1C) (Ca(V)1.2) L-type  
449 calcium channel mediates mechanosensitive calcium regulation, *Am J Physiol Cell*  
450 *Physiol* 283, C1001-1008.
- 451 [32] Joshi, V., Strege, P. R., Farrugia, G., and Beyder, A. (2021) Mechanotransduction in  
452 gastrointestinal smooth muscle cells: role of mechanosensitive ion channels, *Am J*  
453 *Physiol Gastrointest Liver Physiol* 320, G897-G906.
- 454 [33] Nash, D. T., and Nash, S. D. (2008) Ranolazine for chronic stable angina, *Lancet* 372, 1335-  
455 1341.
- 456 [34] Neshatian, L., Strege, P. R., Rhee, P. L., Kraichely, R. E., Mazzone, A., Bernard, C. E.,  
457 Cima, R. R., Larson, D. W., Dozois, E. J., Kline, C. F., Mohler, P. J., Beyder, A., and  
458 Farrugia, G. (2015) Ranolazine inhibits voltage-gated mechanosensitive sodium channels  
459 in human colon circular smooth muscle cells, *Am J Physiol Gastrointest Liver Physiol*  
460 309, G506-512.
- 461 [35] Locke, G. R., 3rd, Ackerman, M. J., Zinsmeister, A. R., Thapa, P., and Farrugia, G. (2006)  
462 Gastrointestinal symptoms in families of patients with an SCN5A-encoded cardiac  
463 channelopathy: evidence of an intestinal channelopathy, *Am J Gastroenterol* 101, 1299-  
464 1304.

- 465 [36] Alper, S. L. (2017) Genetic Diseases of PIEZO1 and PIEZO2 Dysfunction, *Curr Top*  
466 *Membr* 79, 97-134.
- 467 [37] Zarychanski, R., Schulz, V. P., Houston, B. L., Maksimova, Y., Houston, D. S., Smith, B.,  
468 Rinehart, J., and Gallagher, P. G. (2012) Mutations in the mechanotransduction protein  
469 PIEZO1 are associated with hereditary xerocytosis, *Blood* 120, 1908-1915.
- 470 [38] Bae, C., Gnanasambandam, R., Nicolai, C., Sachs, F., and Gottlieb, P. A. (2013)  
471 Xerocytosis is caused by mutations that alter the kinetics of the mechanosensitive channel  
472 PIEZO1, *Proc Natl Acad Sci U S A* 110, E1162-1168.
- 473 [39] Gonlachanvit, S., Mahayosnond, A., and Kullavanijaya, P. (2009) Effects of chili on  
474 postprandial gastrointestinal symptoms in diarrhoea predominant irritable bowel  
475 syndrome: evidence for capsaicin-sensitive visceral nociception hypersensitivity,  
476 *Neurogastroenterol Motil* 21, 23-32.
- 477 [40] Nikolaev, Y. A., Cox, C. D., Ridone, P., Rohde, P. R., Cordero-Morales, J. F., Vasquez, V.,  
478 Laver, D. R., and Martinac, B. (2019) Mammalian TRP ion channels are insensitive to  
479 membrane stretch, *J Cell Sci* 132.
- 480 [41] Mazzone, A., Gibbons, S. J., Eisenman, S. T., Strege, P. R., Zheng, T., D'Amato, M.,  
481 Ordog, T., Fernandez-Zapico, M. E., and Farrugia, G. (2019) Direct repression of  
482 anoctamin 1 (ANO1) gene transcription by Gli proteins, *FASEB J* 33, 6632-6642.
- 483 [42] Agarwal, M. K., Bhatia, S. J., Desai, S. A., Bhure, U., and Melgiri, S. (2002) Effect of red  
484 chillies on small bowel and colonic transit and rectal sensitivity in men with irritable  
485 bowel syndrome, *Indian J. Gastroenterol.* 21, 179-182.
- 486 [43] Aniwaniwan, S., and Gonlachanvit, S. (2014) Effects of Chili Treatment on Gastrointestinal and  
487 Rectal Sensation in Diarrhea-predominant Irritable Bowel Syndrome: A Randomized,  
488 Double-blinded, Crossover Study, *J. Neurogastroenterol. Motil.* 20, 400-406.
- 489 [44] Patcharatrakul, T., and Gonlachanvit, S. (2016) Chili Peppers, Curcumins, and Prebiotics in  
490 Gastrointestinal Health and Disease, *Curr Gastroenterol Rep* 18, 19.

491

492



493 **TABLES**

494 **Table 1. Partition coefficients and IC<sub>50</sub> values for amphipathic agents.** Partition coefficients  
495 denoted log*P*<sub>OW</sub> for amiodarone, capsaicin, propranolol and Triton-X100 were previously  
496 reported<sup>17-20</sup>. IC<sub>50</sub>, concentration at which an amphipathic agent inhibited half of the maximum  
497 peak whole cell Na<sup>+</sup> current from HEK293 cells transfected with Nav1.5.

|                     | Partition coefficient (log <i>P</i> <sub>OW</sub> ) | IC <sub>50</sub> (μM) | Slope |
|---------------------|-----------------------------------------------------|-----------------------|-------|
| <b>Amiodarone</b>   | 7.2                                                 | 8.4                   | 0.50  |
| <b>Capsaicin</b>    | 3.04                                                | 60                    | 0.64  |
| <b>Propranolol</b>  | 3.48                                                | 7.6                   | 1.01  |
| <b>Triton X-100</b> | 4.6                                                 | 5.3                   | 1.00  |

498

499 **Table 2. Effect of capsaicin on pressure-induced Nav1.5 mechanosensitivity in cell-attached**  
500 **patches.** Effects of pressure (0 or -30 mmHg) on parameters of macroscopic Na<sup>+</sup> currents without  
501 (0 μM) or with capsaicin (20 μM): maximum peak Na<sup>+</sup> currents normalized to controls at 0 mmHg  
502 (I<sub>MAX</sub>), voltage dependence of activation (V<sub>1/2A</sub>) or inactivation (V<sub>1/2I</sub>), time constant of activation  
503 (τ<sub>A</sub>), time of inactivation recovery (t<sub>1/2R</sub>), slope of inactivation recovery (slope), maximum use-  
504 dependent inhibition (block), frequency of use-dependent inhibition (f<sub>1/2</sub>). n = 8-24 cells, \**P*<0.05,  
505 0 to -30 mmHg or †*P*<0.05, 0 to 20 μM capsaicin by a 2-way ANOVA with Tukey post-test.

|                                | 0 μM      |            |            |    | 20 μM      |             |            |    |
|--------------------------------|-----------|------------|------------|----|------------|-------------|------------|----|
|                                | 0 mmHg    | -30 mmHg   | Change     | n  | 0 mmHg     | -30 mmHg    | Change     | n  |
| <b>I<sub>MAX</sub> (%)</b>     | 100.0±0.0 | 116.6±2.4* | 16.6±2.4   | 24 | 100.0±0.0  | 104.8±3.0†  | 4.8±3.0    | 14 |
| <b>V<sub>1/2A</sub> (mV)</b>   | -41.9±3.0 | -46.4±3.0* | -4.5±0.6   | 24 | -57.5±2.8† | -60.0±3.1*† | -2.4±0.6   | 14 |
| <b>V<sub>1/2I</sub> (mV)</b>   | -54.1±3.1 | -60.1±3.3* | -6.0±0.9   | 24 | -70.5±3.3† | -71.9±3.5†  | -1.4±1.2   | 14 |
| <b>τ<sub>A</sub> (ms)</b>      | 0.32±0.04 | 0.26±0.04* | -20.0±5.3% | 24 | 0.23±0.04  | 0.21±0.04   | -11.0±5.4% | 14 |
| <b>t<sub>1/2R</sub> (ms)</b>   | 13.2±2.5  | 22.1±4.9*  | 8.9±3.9    | 11 | 29.5±6.4†  | 48.7±9.4*†  | 19.2±8.6   | 11 |
| <b>Slope (ms<sup>-1</sup>)</b> | 1.3±0.1   | 1.2±0.1    | -0.10±0.17 | 11 | 1.9±0.3    | 2.3±0.8     | 0.41±0.87  | 11 |
| <b>Block (%)</b>               | 80.9±7.9  | 77.8±8.6   | 3.2±9.4    | 11 | 93.6±4.5   | 85.5±8.5    | 4.7±3.8    | 8  |
| <b>f<sub>1/2</sub> (Hz)</b>    | 22.3±2.6  | 20.0±2.1   | -2.4±3.3   | 11 | 19.1±2.5   | 14.8±1.4*   | -4.2±1.4   | 8  |

506

507 **Table 3. Effect of capsaicin on shear-induced Nav1.5 mechanosensitivity whole cells.** Effects  
508 of shear stress (0 or 10 mL/min) on parameters of whole cell Na<sup>+</sup> currents without (0 μM) or with  
509 capsaicin (20 μM): maximum peak conductance (G<sub>MAX</sub>), maximum peak current density (I<sub>PEAK</sub>),  
510 voltage dependence of activation (V<sub>1/2A</sub>) or inactivation (V<sub>1/2I</sub>), time constants of activation (τ<sub>A</sub>)  
511 and fast (τ<sub>F</sub>) or slow inactivation (τ<sub>S</sub>), time of inactivation recovery (t<sub>1/2R</sub>), slope of inactivation  
512 recovery (slope), maximum use-dependent inhibition (block), frequency of use-dependent  
513 inhibition (f<sub>1/2</sub>). n = 8-18 cells, \*P<0.05, 0 to 10 mL/min or †P<0.05, 0 to 20 μM capsaicin by a  
514 2-way ANOVA with Tukey post-test.

|                                 | 0 μM       |             |            |    | 20 μM                   |                         |                        |    |
|---------------------------------|------------|-------------|------------|----|-------------------------|-------------------------|------------------------|----|
|                                 | 0 mL/min   | 10 mL/min   | Change     | n  | 0 mL/min                | 10 mL/min               | Change                 | n  |
| <b>G<sub>MAX</sub> (nS)</b>     | 0.98±0.13  | 1.24±0.22*  | 0.26±0.10  | 12 | 0.78±0.12 <sup>†</sup>  | 0.85±0.15 <sup>†</sup>  | 0.08±0.05              | 12 |
| <b>I<sub>PEAK</sub> (pA/pF)</b> | -66.8±12.3 | -86.6±17.7* | 16.0±3.1%  | 12 | -56.7±58.5 <sup>†</sup> | -58.5±11.6 <sup>†</sup> | 3.1±3.8% <sup>†</sup>  | 12 |
| <b>V<sub>1/2A</sub> (mV)</b>    | -57.3±1.7  | -58.9±1.4*  | -1.5±0.6   | 12 | -58.9±1.5 <sup>†</sup>  | -59.2±1.6               | -0.3±0.1               | 12 |
| <b>V<sub>1/2I</sub> (mV)</b>    | -90.3±3.3  | -92.7±2.6*  | -2.5±0.9   | 12 | -95.4±2.6 <sup>†</sup>  | -95.8±2.7 <sup>†</sup>  | -0.5±0.6               | 12 |
| <b>τ<sub>A</sub> (ms)</b>       | 0.5±0.05   | 0.39±0.02*  | -20.4±3.3% | 12 | 0.39±0.04 <sup>†</sup>  | 0.38±0.04               | -1.3±7.0% <sup>†</sup> | 12 |
| <b>τ<sub>F</sub> (ms)</b>       | 0.82±0.08  | 0.57±0.04*  | -27.5±4.0% | 12 | 0.80±0.08               | 0.56±0.05*              | -25.1±5.9%             | 12 |
| <b>τ<sub>S</sub> (ms)</b>       | 4.7±0.3    | 3.5±0.2*    | -24.2±4.4% | 12 | 3.8±0.3 <sup>†</sup>    | 2.9±0.2* <sup>†</sup>   | -20.5±4.8%             | 12 |
| <b>t<sub>1/2R</sub> (ms)</b>    | 18.8±1.7   | 16.6±1.8*   | -2.2±0.6   | 8  | 38.0±4.5 <sup>†</sup>   | 28.4±4.2* <sup>†</sup>  | -9.5±0.9 <sup>†</sup>  | 8  |
| <b>slope (ms<sup>-1</sup>)</b>  | -1.26±0.04 | -1.28±0.05  | -0.02±0.02 | 8  | -1.43±0.02 <sup>†</sup> | -1.42±0.06              | 0.01±0.04              | 8  |
| <b>Block (%)</b>                | 64.6±2.4   | 64.7±2.6    | 0.2±1.7    | 18 | 89.0±1.4 <sup>†</sup>   | 83.9±2.0* <sup>†</sup>  | -5.1±0.9 <sup>†</sup>  | 10 |
| <b>f<sub>1/2</sub> (Hz)</b>     | 26.1±2.0   | 27.3±2.3    | 1.2±0.9    | 18 | 18.9±1.0 <sup>†</sup>   | 21.0±1.7                | 2.1±1.4                | 10 |

515

516

517 **FIGURE LEGENDS**

518 **Figure 1. Amphipathic compounds inhibit voltage-gated Na<sup>+</sup> currents from Nav1.5 channels**

519 **expressed in HEK293 cells.** *A*, Molecular structures of the amphipaths (from *left* to *right*):

520 amiodarone, capsaicin, propranolol, and Triton X-100. *B-C*, Representative Na<sup>+</sup> currents elicited

521 by a step from -120 to the -35-mV test voltage (*B*), and peak Na<sup>+</sup> current-voltage plots across all

522 test voltages (*C*) with 10<sup>-9</sup> to 10<sup>-4</sup> M (*blue-red spectrum*) of membrane-permeable amphipathic

523 compounds in the extracellular solution. *D*, Dose-response curves for maximum peak Na<sup>+</sup> current

524 of Nav1.5 vs. amphipathic concentration; IC<sub>50</sub> values: amiodarone, 8.4 μM; capsaicin, 60.2 μM;

525 propranolol, 7.6 μM; Triton X-100, 5.3 μM.

526

527 **Figure 2. Capsaicin inhibits pressure- and shear-sensitivity of Nav1.5.** *A*, Representative

528 Nav1.5 currents elicited by voltage ladders ranging -100 to 0 mV in a cell-attached patch (*A*)

529 or -120 mV to -30 mV in a whole cell (*B*), recorded at rest (*filled symbols*) or with force (*empty*

530 *symbols*), in the presence of 0 μM (*black*) or 20 μM capsaicin (*red*). Difference currents were

531 constructed by subtracting the control Na<sup>+</sup> currents from the pressure- (*A*) or shear-stimulated (*B*)

532 currents. *C-D*, Steady-state activation (*C*) and inactivation (*D*) curves of Na<sup>+</sup> currents in cell-

533 attached patches (*left*) or whole cells (*right*), recorded at rest (*filled symbols*) or with force (*empty*

534 *symbols*), in the presence of 0 μM (*black*) or 20 μM capsaicin (*red*). *E-H*, Maximum peak Na<sup>+</sup>

535 current (*E*), time constant of activation (*F*), and voltage dependence of activation (*G*, V<sub>1/2A</sub>) or

536 inactivation (*H*, V<sub>1/2I</sub>), recorded with 0 or -30 mmHg pressure in the patch (*left*) and 0 or 10 mL/min

537 shear stress in whole cells (*right*) in the presence of 0 μM (*black*) or 20 μM capsaicin (*red*). n =

538 12-24 cells, \**P*<0.05 comparing 0 to -30 mmHg or 0 to 10 mL/min, †*P*<0.05 comparing 0 to 20

539 μM capsaicin by a 2-way ANOVA with Tukey post-test.

540  
541 **Figure 3. Effects of capsaicin on mechanosensitivity of Nav1.5 inactivation recovery time.** *A-*  
542 *B*, Representative Nav1.5 currents at -20 mV in a cell-attached patch (*A*, ●) or -30 mV in a whole  
543 cell (*B*, ■), elicited after recovering from the control pulse for 3-300 ms at -120 mV (*A*) or 3-1000  
544 ms at -130 mV (*B*). Na<sup>+</sup> currents were recorded at rest (*grey*) or with force (*dark traces*: *A*, -30  
545 mmHg pressure; *B*, 10 mL/min shear stress) in the presence of 0 μM (*top*) or 20 μM capsaicin  
546 (*bottom*). *C-D*, Normalized peak Na<sup>+</sup> current versus recovery time in the presence of 0 μM (*black*)  
547 or 20 μM capsaicin (*red*), at 0 (●) or -30 mmHg pressure (○) in the patch (*C*) or at 0 (■) or 10  
548 mL/min (□) shear stress in whole cells (*D*). *E-F*, Inactivation recovery times (*t*<sub>1/2</sub>) versus 0 or -30  
549 mmHg pressure in the patch (*E*) and 0 or 10 mL/min shear stress in whole cells (*F*) with 0 μM  
550 (*black*) or 20 μM capsaicin (*red*). n = 8-11 cells, \**P*<0.05 comparing 0 to -30 mmHg or 0 to 10  
551 mL/min, †*P*<0.05 comparing 0 to 20 μM capsaicin by a 2-way ANOVA with Tukey post-test.

552  
553 **Figure 4. Effects of capsaicin on mechanosensitivity of Nav1.5 use-dependent inactivation.** *A-*  
554 *B*, Representative Nav1.5 currents at the 20<sup>th</sup> pulse to -20 mV in a cell-attached patch (*A*, ●) or  
555 to -40 mV in a whole cell (*B*, ■), elicited at interpulse frequencies 3-33 Hz (*A*) or 3-50 Hz (*B*). Na<sup>+</sup>  
556 currents were recorded at rest (*grey*) or with force (*dark traces*: *A*, -30 mmHg pressure; *B*, 10  
557 mL/min shear stress) in the presence of 0 μM (*top*) or 20 μM capsaicin (*bottom*). *C-D*, Use-  
558 dependent inhibition of peak Na<sup>+</sup> current versus interpulse frequency in the presence of 0 μM  
559 (*black*) or 20 μM capsaicin (*red*), at 0 (●) or -30 mmHg pressure (○) in the patch (*C*) or at 0 (■) or  
560 10 mL/min (□) shear stress in whole cells (*D*). *E-F*, Maximum use-dependent inhibition (*E*) or  
561 frequency of use-dependent inhibition (*F*) versus pressure in the patch (*left*) and shear stress in  
562 whole cells (*right*) with 0 μM (*black*) or 20 μM capsaicin (*red*). n = 8-18 cells, \**P*<0.05 comparing

Alteration of Nav1.5 mechanosensitivity by capsaicin  
Cowan et al.

Page 29

563 0 to -30 mmHg or 0 to 10 mL/min, † $P < 0.05$  comparing 0 to 20  $\mu$ M capsaicin by a 2-way ANOVA  
564 with Tukey post-test.  
565

566 **FIGURES**

567 **Figure 1.**

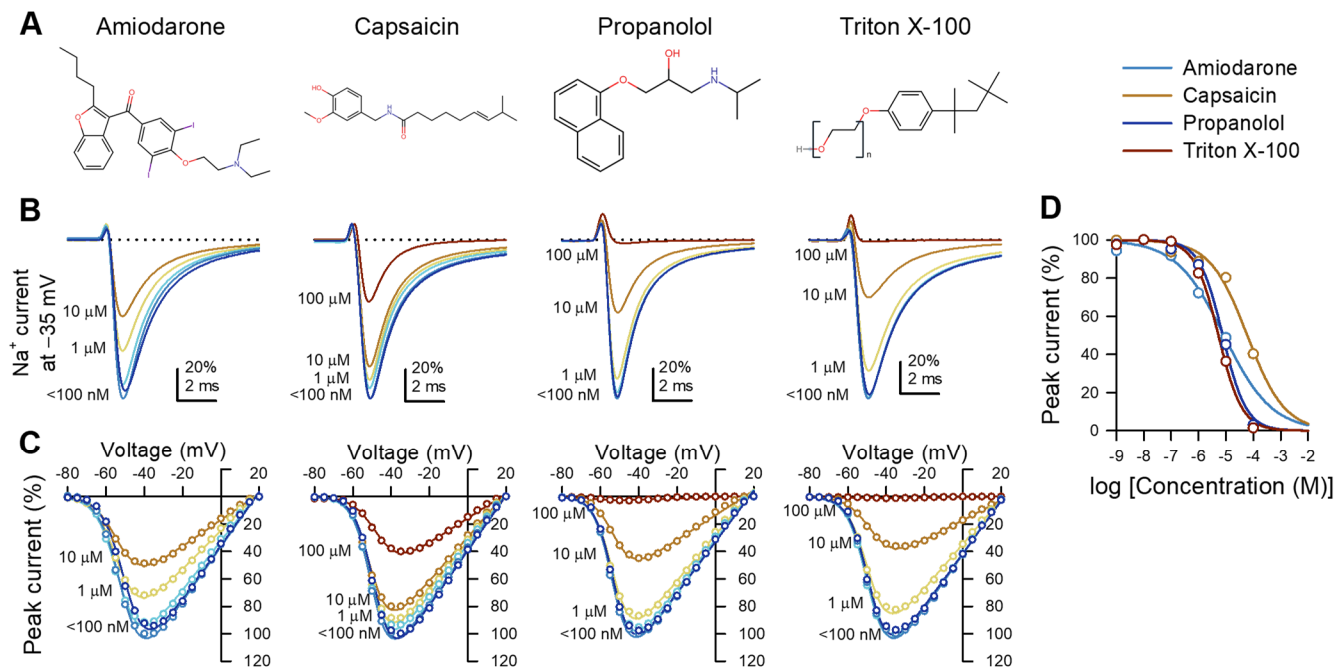

568

569

570 **Figure 2.**

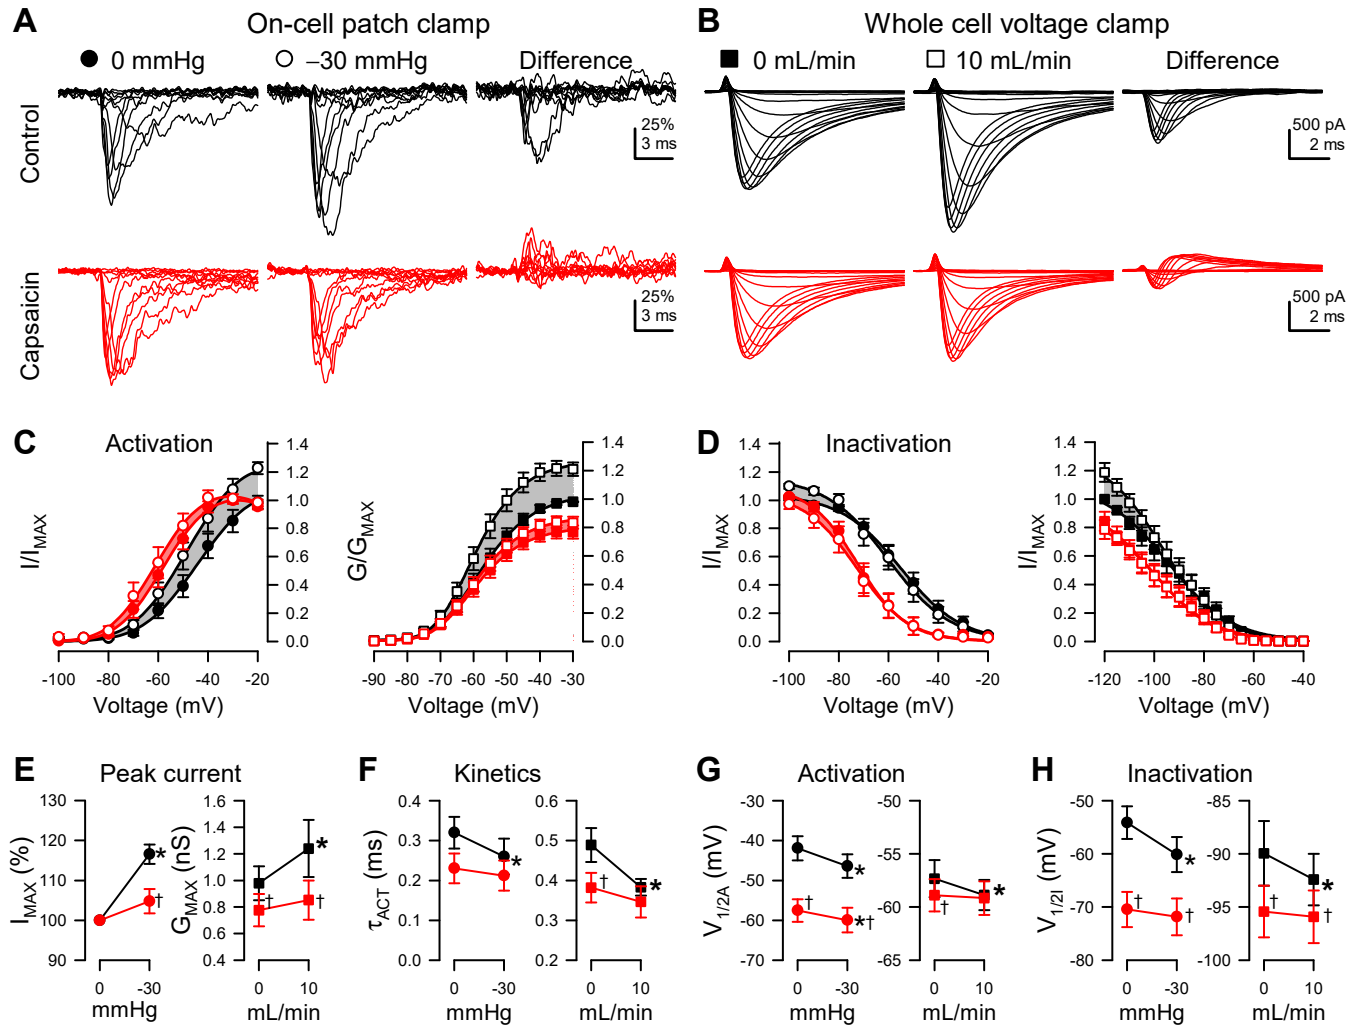

571

572 **Figure 3.**

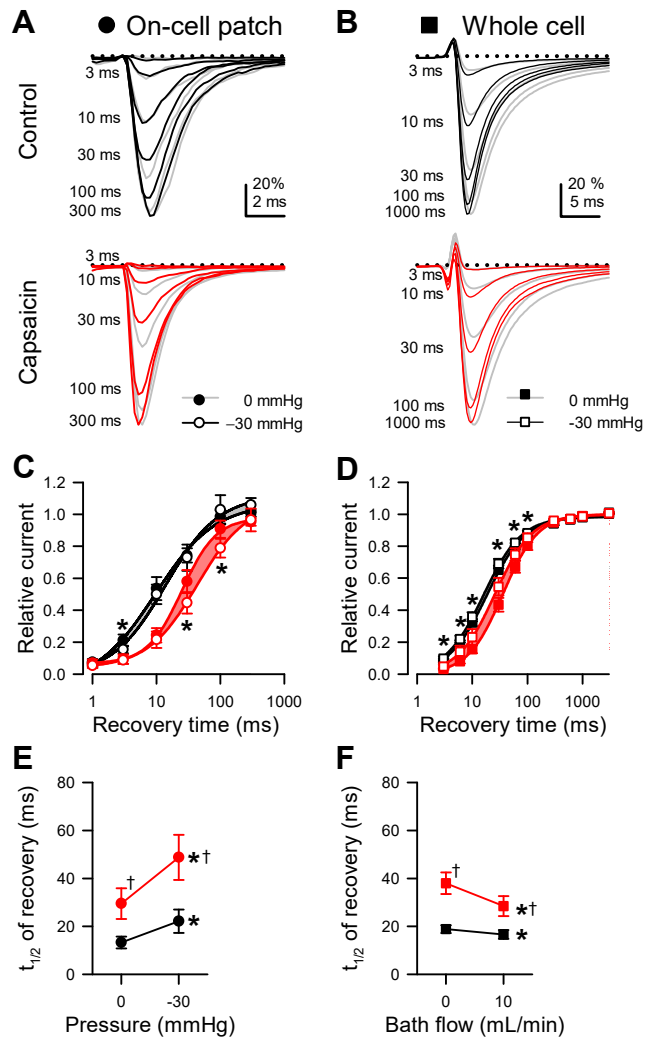

573



574 **Figure 4.**

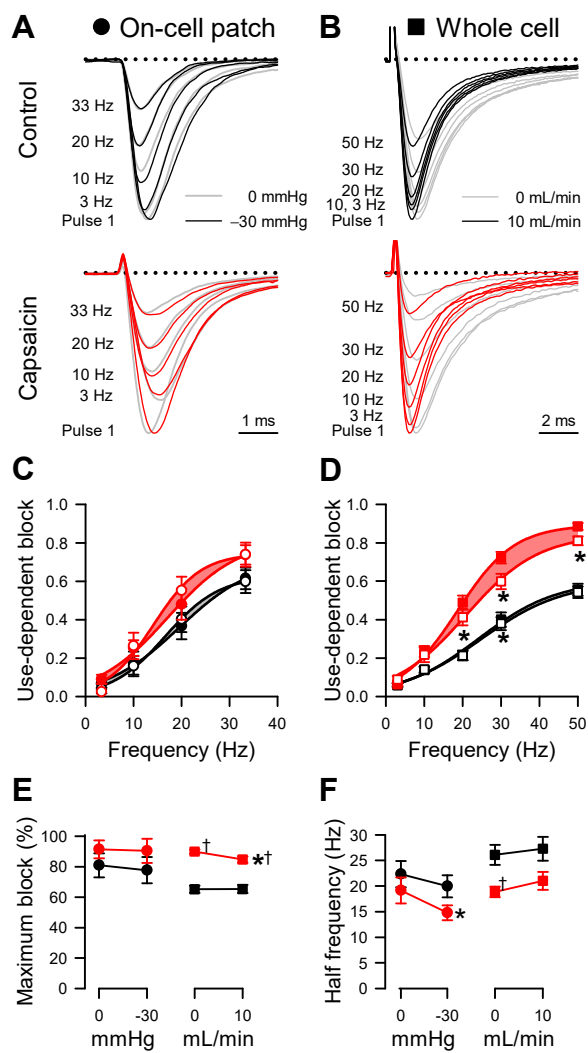

575
